# Supplementary material for: Exosomal miRNA-21 from Toxoplasma gondii-infected microglial cells induces the growth of U87 glioma cells by inhibiting tumor suppressor genes
Source: PubMed Central journal article supplement (PMC9525672; doi:10.1038/s41598-022-20281-w), 2022-09-30
Supplement: 41598_2022_20281_MOESM1_ESM.pdf [file 41598_2022_20281_MOESM1_ESM.pdf]

**Exosomal microRNA-21 from *Toxoplasma gondii*-infected microglial cells induces growth of U87 glioma cells by inhibiting tumor suppressor genes**

Bong-Kwang Jung<sup>1</sup>, Hyemi Song<sup>1</sup>, Hyejoo Shin<sup>1</sup> & Jong-Yil Chai<sup>1,2\*</sup>

<sup>1</sup>MediCheck Research Institute, Korea Association of Health Promotion, Seoul 07649, Korea.

<sup>2</sup>Department of Tropical Medicine and Parasitology, Seoul National University College of Medicine, Seoul 03080, Korea. Email: [cjy@snu.ac.kr](mailto:cjy@snu.ac.kr)

\*Corresponding author: Jong-Yil Chai ([cjy@snu.ac.kr](mailto:cjy@snu.ac.kr)), Seoul National University College of Medicine, Seoul 03080, South Korea (Tel: +82-10-6269-3318).

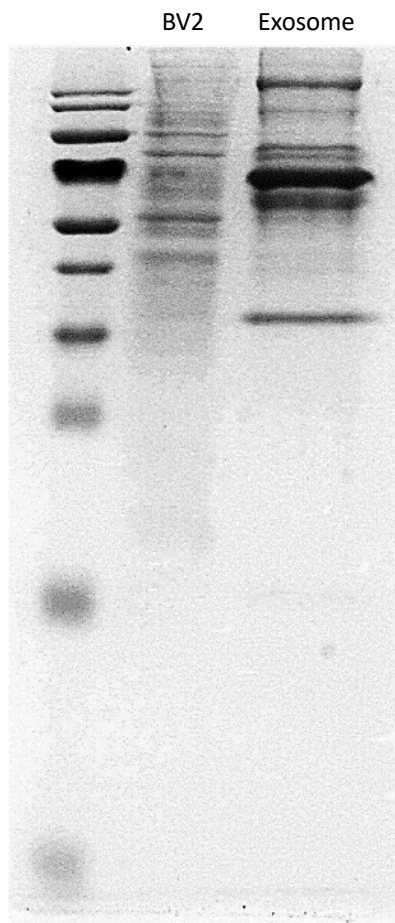

**Figure S1. Characterization of BV2 cell-derived exosomes.** The full image of SDS-PAGE. Protein was isolated from either BV2 cells or BV2-derived exosomes. The pattern of proteins was different between the cell and exosomes.

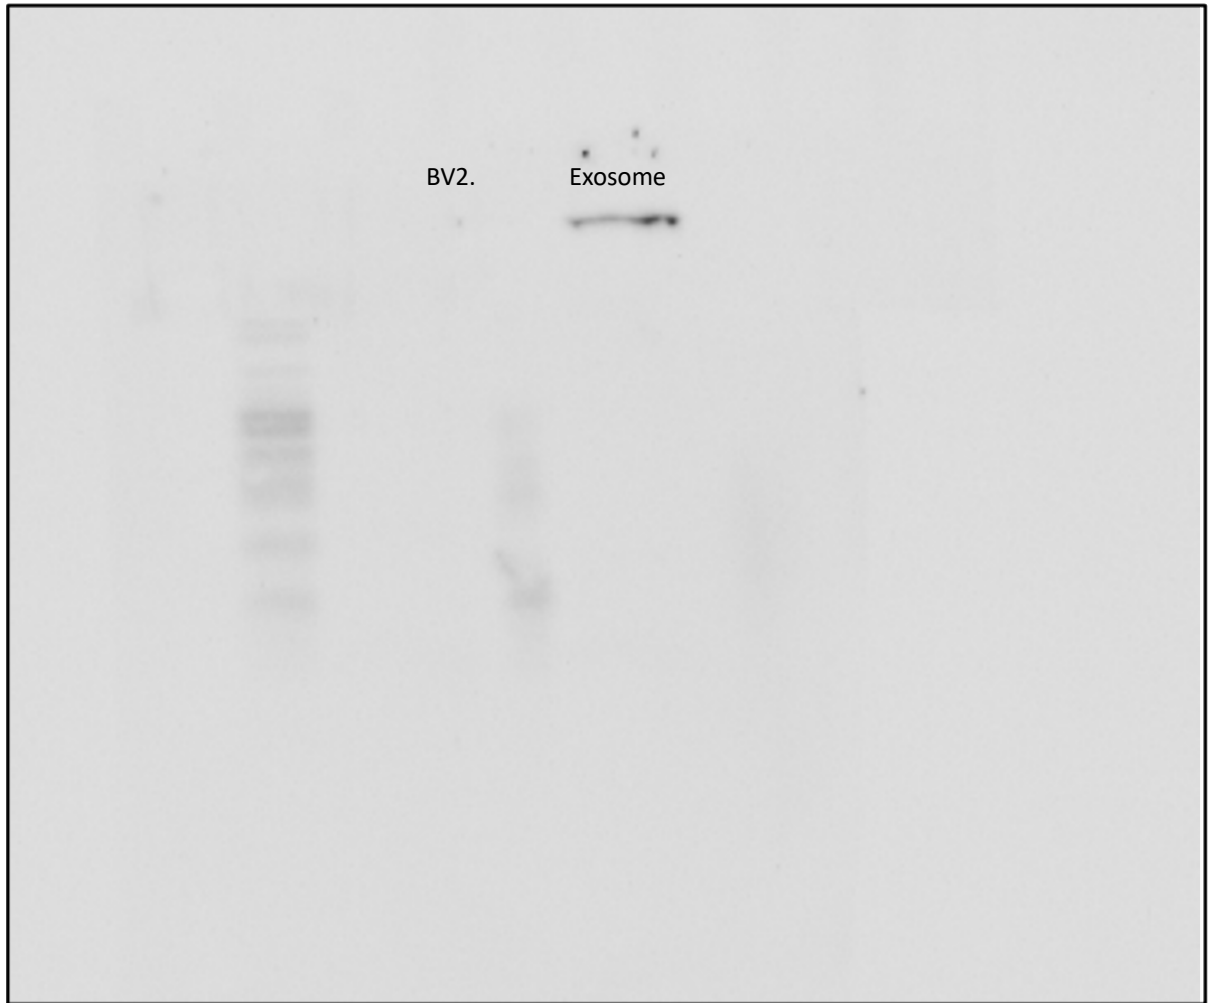

**Figure S2. Characterization of BV2 cell-derived exosomes.** The full image of western blot analysis of exosome marker (Alix).

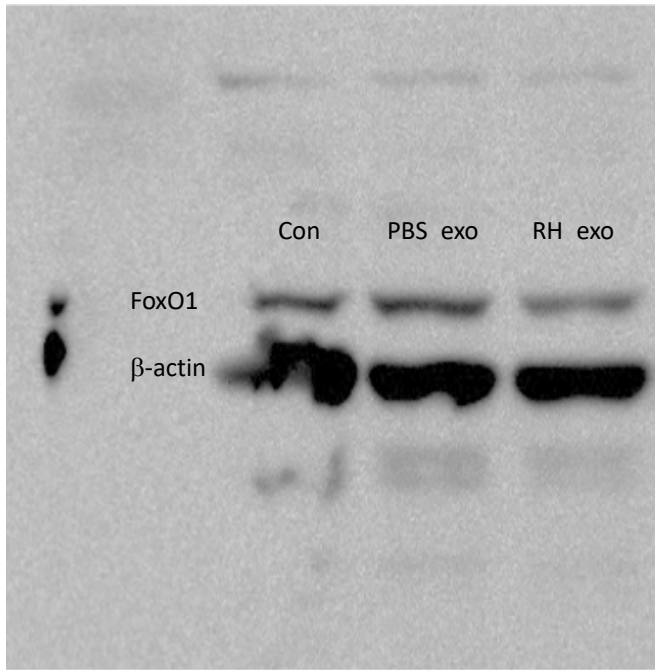

**Figure S3.** *Toxoplasma* RH-infected BV2-derived exosomes induce downregulation of anti-tumor associated genes in U87 glioma cells by *Toxoplasma* RH-infected BV2-derived exosomes. The full image of western blot analysis of FoxO1 expression.
